# 1 **Title: Ancient Genomics Reveals Four Prehistoric Migration Waves** 2 **into Southeast Asia**

3

4 **Authors:** Hugh McColl<sup>1,\*^</sup>, Fernando Racimo<sup>1,\*</sup>, Lasse Vinner<sup>1,\*</sup>, Fabrice Demeter<sup>1,2,\*</sup>, J.  
5 Víctor Moreno Mayar<sup>1</sup>, Uffe Gram Wilken<sup>1</sup>, Andaine Seguin-Orlando<sup>1</sup>, Constanza de la Fuente  
6 Castro<sup>1</sup>, Sally Wasef<sup>3</sup>, Ana Prohaska<sup>4</sup>, Ashot Margarayan<sup>1,5</sup>, Peter de Barros Damgaard<sup>1</sup>,  
7 Rasmi Shoocongdej<sup>6</sup>, Viengkeo Souksavady<sup>7</sup>, Thongsa Sayavongkhamdy<sup>7</sup>, Mohd Mokhtar  
8 Saidin<sup>8</sup>, Supanee Kaewsutthi<sup>9</sup>, Patcharee Lertrit<sup>9</sup>, Huong Mai Nguyen<sup>10</sup>, Hsiao-chun Hung<sup>11</sup>,  
9 Thi Minh Tran<sup>10</sup>, Huu Nghia Truong<sup>10</sup>, Shaiful Shahidan<sup>8</sup>, Ketut Wiradnyana<sup>12</sup>, Anne-Marie  
10 Bacon<sup>13</sup>, Philippe Durringer<sup>14</sup>, Jean-Luc Ponche<sup>14,15</sup>, Laura Shackelford<sup>16</sup>, Elise Patole-  
11 Edoumba<sup>17</sup>, Anh Tuan Nguyen<sup>10</sup>, Bérénice Bellina-Pryce<sup>18</sup>, Jean-Christophe Galipaud<sup>19</sup>,  
12 Rebecca Kinaston<sup>20</sup>, Hallie Buckley<sup>20</sup>, Christophe Pottier<sup>21</sup>, Simon Rasmussen<sup>22</sup>, Tom  
13 Higham<sup>23</sup>, Robert A. Foley<sup>24</sup>, Marta Mirazón Lahr<sup>24</sup>, Ludovic Orlando<sup>1,25</sup>, Martin Sikora<sup>1</sup>,  
14 Charles Higham<sup>20</sup>, David M. Lambert<sup>3</sup>, Eske Willerslev<sup>1,4,26,^</sup>

15

## 16 **Affiliations:**

17 <sup>1</sup>Centre for GeoGenetics, Natural History Museum of Denmark, Copenhagen, Denmark.

18 <sup>2</sup>National Museum of Natural History, Ecoanthropology and Ethnobiology, Musée de  
19 l'Homme, Paris, France.

20 <sup>3</sup>Australian Research Centre for Human Evolution, Griffith University, Nathan, Australia.

21 <sup>4</sup>Department of Zoology, University of Cambridge, UK.

22 <sup>5</sup>Institute of Molecular Biology, National Academy of Sciences, Armenia.

23 <sup>6</sup>Department of Archaeology, Silpakorn University, Bangkok, Thailand.

24 <sup>7</sup>Department of Museums, Historic Buildings and Archaeology, Ministry of Information,  
25 Culture and Tourism, Lao Democratic People's Republic.

26 <sup>8</sup>Centre for Global Archaeological Research, Universiti Sains Malaysia, Malaysia.

27 <sup>9</sup>Department of Biochemistry, Faculty of Medicine Siriraj Hospital, Mahidol University,  
28 Bangkok, Thailand.

29 <sup>10</sup>Anthropological and Palaeoenvironmental Department, Institute of Archaeology, Hanoi,  
30 Vietnam.

31 <sup>11</sup>Department of Archaeology and Natural History, Australian National University, Canberra,  
32 Australia.

33 <sup>12</sup>Balai Archeology, Medan, Indonesia.

34 <sup>13</sup>Laboratoire AMIS, Université Paris Descartes, Faculté de chirurgie dentaire, Montrouge,  
35 Paris, France.

36 <sup>14</sup>École et Observatoire des Sciences de la Terre, Université de Strasbourg, Strasbourg, France.

37 <sup>15</sup>Institut de Chimie et Procédés pour l'Énergie, l'Environnement et la Santé, Université de  
38 Strasbourg, France.

39 <sup>16</sup>Department of Anthropology, University of Illinois at Urbana-Champaign, USA.

40 <sup>17</sup>Natural History Museum of La Rochelle, La Rochelle, France.

41 <sup>18</sup>Prehistory and Technology, Maison Archéologie et Ethnologie, Nanterre, France.

42 <sup>19</sup>Research Institute for Development, National Museum of Natural History, UMR Paloc,  
43 France.

44 <sup>20</sup>Department of Anatomy, Otago School of Medical Sciences, University of Otago, Dunedin,  
45 New Zealand.

46 <sup>21</sup>École française d'Extrême-Orient, Paris, France.

47 <sup>22</sup>Department of Bio and Health Informatics, Technical University of Denmark, Denmark.

48 <sup>23</sup>Radiocarbon Accelerator Unit, University of Oxford, UK.

49 <sup>24</sup>Leverhulme Centre for Human Evolutionary, Studies, Department of Archaeology,  
50 University of Cambridge, UK.

51 <sup>25</sup>Laboratoire AMIS, Université Paul Sabatier (UPS), Toulouse, France

52 <sup>26</sup>Wellcome Trust Sanger Institute, UK.

53 \* Joint first authors

54 ^ Corresponding authors (HM - [hmccoll@snm.ku.dk](mailto:hmccoll@snm.ku.dk) and EW - [ewillerslev@snm.ku.dk](mailto:ewillerslev@snm.ku.dk))

55

56

57 **Abstract: Two distinct population models have been put forward to explain present-day**  
58 **human diversity in Southeast Asia. The first model proposes long-term continuity**  
59 **(Regional Continuity model) while the other suggests two waves of dispersal (Two Layer**  
60 **model). Here, we use whole-genome capture in combination with shotgun sequencing to**  
61 **generate 25 ancient human genome sequences from mainland and island Southeast Asia,**

62 **and directly test the two competing hypotheses. We find that early genomes from**  
63 **Hoabinhian hunter-gatherer contexts in Laos and Malaysia have genetic affinities with**  
64 **the Onge hunter-gatherers from the Andaman Islands, while Southeast Asian Neolithic**  
65 **farmers have a distinct East Asian genomic ancestry related to present-day Austroasiatic-**  
66 **speaking populations. We also identify two further migratory events, consistent with the**  
67 **expansion of speakers of Austronesian languages into Island Southeast Asia ca. 4 kya,**  
68 **and the expansion by East Asians into northern Vietnam ca. 2 kya. These findings**  
69 **support the Two Layer model for the early peopling of Southeast Asia and highlight the**  
70 **complexities of dispersal patterns from East Asia.**

71

## 72 **Main Text:**

73 The population history of Southeast Asia (SEA) has been shaped by interchanging  
74 periods of isolation and connectivity. Anatomically modern humans first colonized SEA at  
75 least 70,000 years ago (kya) (1–3). Within SEA, the complex topography and changes in sea  
76 level promoted regional expansions and contractions of populations. By the late  
77 Pleistocene/early Holocene, a pan-regional lithic technological culture was established across  
78 mainland SEA, named Hoabinhian (4–7). Hoabinhian foragers are thought to be the ancestors  
79 of present-day SEA hunter-gatherers, sometimes referred to as ‘Negritos’ because of their  
80 comparatively darker skin colour and short stature. Today, however, the majority of people in  
81 SEA are believed to be descendants of rice and millet farmers with varying degrees of East  
82 Asian phenotypic affinity, suggesting that human diversity in SEA was strongly influenced by  
83 population expansions from the north (4). Yet, the extent to which the movements from East  
84 Asia (EA) impacted on the genetic and cultural makeup of the people of SEA remains  
85 controversial.

86 Two distinct population models have been proposed to account for the biological and  
87 cultural diversity of human populations in present-day SEA. The Regional Continuity model,  
88 based primarily on morphological evidence, argues for a long-standing evolutionary continuity  
89 without significant external gene flow and for the Neolithic transition in SEA occurring as  
90 hunter-gatherer groups adopted agriculture, either independently or through cultural contact  
91 (8–21). While this model does not necessarily argue for the independent domestication of crops  
92 across SEA, it posits that gene flow from EA farmers was not the main mechanism behind the

93 Neolithic transition. In contrast, the Two Layer model advocates for two major dispersal waves  
94 into SEA, where EA farmers replaced the original Hoabinhian inhabitants across SEA through  
95 a major demographic southward expansion *ca.* 4 kya. The exception to this would be the  
96 isolated populations of the Andaman Islands, peninsular Thailand/Malaysia and the Philippines  
97 which are considered the primary descendants of Hoabinhian hunter-gatherers (22, 23). Under  
98 this model, the migratory wave of farmers originated in present-day China, where rice and  
99 millet were fully domesticated in the Yangtze and Yellow River valleys between 9-5.5 kya,  
100 and paddy fields developed by 4.5 kya (4, 24–26). Farming practices are thought to have  
101 accompanied these populations as they spread southward through two main routes – an inland  
102 wave associated with the expansion of Austroasiatic languages, and an island-hopping route  
103 associated with Austronesian languages which eventually reached the Pacific (27, 28). Within  
104 mainland SEA (MSEA), exchanges with EA appear to have continued in the recent past,  
105 however, the extent to which these expansions had a genetic impact on the indigenous  
106 populations is unknown.

107 Genetic studies of contemporary SEA populations have not resolved these  
108 controversies (29–32). Ancient genomics can provide direct evidence of past population  
109 events. However, SEA is characterised by tropical and monsoonal climates which cause heavy  
110 weathering and acidification of soils (33), so ancient genomic studies have, so far, been  
111 unsuccessful there. Though shotgun sequencing has revolutionized ancient genomic studies by  
112 allowing the retrieval of all mappable DNA fragments from an ancient sample (34, 35), the  
113 inverse relationship between the proportion of endogenous DNA and the cost of shotgun  
114 sequencing makes this approach impractical to apply widely to regions with poor DNA  
115 preservation such as SEA. Genome wide SNP capture is one way to circumvent the issue (36,  
116 37), but it retrieves only a pre-selected subset of all variants of the genome and thus sacrifices  
117 the full potential of rare and irreplaceable fossil samples. An alternative approach is whole  
118 genome capture in which human ancient human DNA fragments are enriched through  
119 hybridisation to baits that cover the entire mappable human genome (15).

120 We performed comparative testing of three different capture approaches for human  
121 DNA - the SeqCap EZ Human Exome Kit v3.0 cat no. 6740294001 (Roche Nimblegen, CA,  
122 USA), the SureSelect Human All Exon V5+UTRs cat. no. 5190-6213 (Agilent Technologies)  
123 and the Custom MYbaits Whole Genome Enrichment (WGE) Kit version 2.0 (Arbor

124 Biosciences) - with the aim of applying the most effective method to ancient human remains  
125 from tropical SEA (SOM1). We found a modified version of MYbaits Whole Genome  
126 Enrichment to be the best-performing method. We applied this method, in combination with  
127 shotgun sequencing approaches where sufficient endogenous DNA allowed it, to samples from  
128 Malaysia, Thailand, Philippines, Vietnam, Indonesia and Laos, dating between 0.2 and 8 kya  
129 (SOM2). We obtained 25 low-coverage ancient genomes (Table 1), along with mtDNA and  
130 nuclear DNA from an additional set of 16 individuals (Table S3), belonging to hunter-gatherers  
131 from the Hoabinhian culture, as well as Neolithic, Bronze Age and Iron Age farmers (SOM3).  
132 All samples showed damage patterns typical of ancient DNA (38) (Table S3).

133 To address the genetic relationships among the ancient individuals, we performed a  
134 principal component analysis (PCA) with our Pan-Asia Panel (see Methods) using *smartpca*  
135 (39). We projected the ancient samples onto the first two principal components of a PCA  
136 constructed solely with present-day samples (40) (SOM4). We then used ADMIXTURE (41)  
137 to find reference latent ancestry components that could best fit our present-day data, and then  
138 used *fastNGSadmix* (42, 43) to model the low-coverage ancient samples as mixtures of these  
139 reference components (SOM5). Unlike all other ancient samples, the two Hoabinhian samples  
140 (which also happen to be the oldest samples in our study) - Pha Faen, Laos (La368 -  $^{14}\text{C}$  7,888  
141  $\pm$  40) and Gua Cha, Malaysia (Ma911 -  $^{14}\text{C}$  4,319  $\pm$  64) - designated as Group 1, cluster  
142 distantly from most East and Southeast Asians in the PCA and position closely to present-day  
143 Onge (Figure 1A). Group 1 individuals also contain a mixture of several different ancestral  
144 components in the *fastNGSadmix* plot, including components shared with Onge, the Pahari and  
145 Spiti from India, Papuans and Jehai (a Malaysian ‘Negrito’ group), which are markedly  
146 different from the other SEA ancient samples. This possibly results from our modeling of  
147 ancient populations as a mixture of components inferred in present-day populations, via  
148 *fastNGSadmix* (44), and from the fact the ancient samples are likely poorly represented by a  
149 single present-day group. The rest of the ancient samples are defined primarily by East and  
150 Southeast Asian components that are maximised in present-day Austroasiatic (Mlabri and  
151 Htin), Austronesian (Ami) and Hmong (indigenous to the mountainous regions of China,  
152 Vietnam, Laos and Thailand) populations, along with a broad East Asian component.

153 We used outgroup  $f_3$  statistics ( $f_3(\text{Mbuti}; X, \text{Ancient samples})$ ) to determine which  
154 populations have the highest levels of shared drift with each of the ancient individuals (SOM6).

155 Group 1 shares the most drift with certain ancient mainland samples (Figure S12, Table S4).  
156 Again, we see that the closest present-day populations to Group 1 are from the Andaman  
157 Islands (Onge) and then Kensiu (a Malaysian ‘Negrito’ group), Ami and Jehai, followed by a  
158 mix of East and Southeast Asian populations.

159 We used D-statistics of the form  $D(\text{Papuan}, \text{Tianyuan}, X, \text{Mbuti})$ , where X is a test  
160 population, to explore the relatedness of ancient and present-day Southeast Asians to two  
161 highly differentiated groups: Papuans and an ancient northern East Asian individual (Tianyuan  
162 - a 40 kya-old sample from Northeastern China (45)). The values of this D-statistic are  
163 consistent with present-day and ancient SEA mainland samples being more closely related to  
164 Tianyuan than to Papuans (SOM7). This applies to present-day northern EA populations, and -  
165 more weakly - to most populations of ancient and present-day SEA. However, this D-statistic  
166 is not significantly different from 0 in present-day Jehai, Onge, Jarawa and Group 1 - the  
167 ancient Hoabinhians (Figure 2B, Tables S12, SOM7). While the Onge’s relationship with  
168 Papuans and Tianyuan is unclear, D-statistics of the form  $D(\text{Onge}, \text{Tianyuan}, X, \text{Mbuti})$ , where  
169 X is a test population, show that Jarawa, Jehai and the ancient Group 1 share more ancestry  
170 with Onge than with Tianyuan (Figure 2C, SOM7). Like the Onge, both Group 1 samples carry  
171 mtDNA haplogroups from the M lineage (Table S3), thought to represent the coastal migration  
172 to Australasia (12, 13, 28, 46).

173 To assess the diversity among the remaining ancient individuals, we computed a new  
174 PCA including only EA and SEA populations that did not have considerable Papuan or Onge-  
175 like ancestry in the *fastNGSadmix* analysis (Figure S11), as it was done in the Pan-Asian SNP-  
176 capture study (30). We observe that the remaining ancient samples form five slightly  
177 differentiated clusters within the EA and SEA populations (Groups 2-6, Figure 1B), in broad  
178 concordance with the *fastNGSadmix* (at  $K=13$ , Figure 1) and  $f_3$  results (Figure S12-S19;  
179 SOM4). We thus decided to organize these samples into five more groups to facilitate further  
180 analyses (Groups 2-6, Table 1), although we note that genetic differentiation among them  
181 seems to be highly clinal. Samples Vt719, Th531 and Vt778 were either geographic or  
182 temporal outliers to their groups and were therefore analyzed separately in groups denoted by a  
183 “.1”: Group 3.1 (Th531, Vt719) and Group 4.1 (Vt778).

184 Group 2 samples from Vietnam, Laos, and the Malay Peninsula are the oldest samples  
185 after Group 1, and range in age from 4.2 to 2.2 kya. At  $K = 6$  (SOM5), Group 2 individuals, the



186 present-day Mlabri and a single Htin individual are the only MSEA samples in the  
187 *fastNGSadmix* analysis to lack the broad EA component (dark green) maximised in northern  
188 EA, with the exception of the Malaysian ‘Negritos’ and ‘Proto-Malays’ (Temuan). At  $K = 7$ , a  
189 bright green component is maximised in these populations, and this component is also found in  
190 present-day Indonesian samples west of Wallace’s Line. The two ancient Indonesian samples  
191 (Group 5; 2.2 to 1.9 kya) represent a mix of Austronesian- and Austroasiatic-like ancestry,  
192 similar to present-day western Indonesians. Indeed, after Mlabri and Htin, the closest  
193 populations to Group 2 based on outgroup- $f_3$  statistics are the western Indonesian samples  
194 (from Bali and Java) reported to have the highest amounts of ancestry from mainland SEA (47)  
195 (Figure S13).

196 These lines of evidence suggest Group 2 are possible descendants of an “Austroasiatic”  
197 migration that expanded southward across MSEA and into island SEA (ISEA) by 4 kya (27,  
198 47–49). We also observe a gradient in “Austronesian-like” vs. “Austroasiatic-like” ancestry in  
199 the PCA (Figure 1B): while PC1 separates populations found in SEA and those found in  
200 northern EA, PC2 distinguishes population based on their amounts of Austronesian-like  
201 ancestry (pink component in Figure 1 - lower panel) versus Austroasiatic-like ancestry (bright  
202 green component in Figure 1 - lower panel).

203 Group 6 samples are recent (between 1.8 and 0.2 kya) and come from Malaysia and the  
204 Philippines. They fall within the variation of present-day populations with high Austronesian  
205 ancestry in these areas. Group 6 also contains the individual (Ma554) with the highest amounts  
206 of Denisovan ancestry relative to the other ancient samples, although variation in archaic  
207 ancestry is not very strong across MSEA (SOM10).

208 The remaining mainland samples (Groups 3 and 4) are dated to be from 2.6 to 0.2 kya.  
209 They appear similar to present-day MSEA populations and fall into two groups. Group 3 is  
210 largely composed of ancient samples from Vietnam but also includes one sample from  
211 Thailand (Th531); these samples cluster in the PCA with the Dai from China, Tai-Kadai  
212 speakers from Thailand and Austroasiatic speakers from Vietnam, including the Kinh (Figures  
213 S9). In contrast, Group 4 largely contains ancient samples from Long Long Rak, Thailand, but  
214 also includes the inland-most sample from Vietnam (Vt778). These samples fall within the  
215 variation of present-day Austroasiatic and Sino-Tibetan speakers from Thailand and China,  
216 supporting the hypothesis that the Long Long Rak population originated in South China, and

217 subsequently expanded southward during the Dongson period (50). At Long Long Rak, three  
218 individuals (Th387, Th530 and Th531) dated to approximately 1.6 kya were found in the same  
219 chamber. Interestingly, all three individuals share the same mtDNA haplogroup (G2b1a), but  
220 the nuclear ancestries for the two samples which yielded genome-wide data are quite different:  
221 Th531 clusters best with Group 3, while Th530 with Group 4. These results suggests that  
222 individuals with ancestry from distant regions likely cohabited at this locality.

223 To determine if any of the ancient samples had affinities to particular populations  
224 outside SEA, we computed D-statistics of the form  $D(\text{Group A, Group B, Not-SEA,}$   
225  $\text{Yoruba/Mbuti})$  to compare each of the ancient groups. Group 2 has a significant affinity to the  
226 Indian populations of Khonda Dora ( $Z = 6.3$ ), relative to Group 3 ( $D(\text{Group2, Group3, Khonda}$   
227  $\text{Dora, Yoruba})$ ), in agreement with previous reports of East Asian ancestry in tribal Indian  
228 Groups (51, 52). We also investigated the affinity between certain Australasian populations  
229 and particular Native American groups, like the Surui (45, 53, 54). When computing  $D(\text{Mixe,}$   
230  $\text{Surui, X, Yoruba})$ , we find that the Group 1 samples had some suggestive but non-significant  
231 affinity to Surui relative to Mixe ( $Z = -2.18$  when  $X = \text{Ma911}$ ,  $Z = -2.48$  when  $X = \text{La368}$ ;  
232 Table S19), although the signal is not as robust as observed for Tianyuan ( $Z = -3.53$ ), Khonda  
233 Dora ( $Z = -3.04$ ) and Papuans ( $Z = -3.02$ ), among others (53, 54). We note, however, that there  
234 are much fewer SNPs to compute this statistic on Group 1 samples than on the other  
235 populations (La368: 191,797; Ma911: 47,816; Tianyuan: 295,628, Papuan: 471,703, Khonda  
236 Dora: 496,097), thus we may be underpowered to detect this signal.

237 We used *TreeMix* (55) to explore admixture graphs that could potentially fit our data.  
238 The ancient Group 1 (Onge-like) individuals are best modelled as a sister group to present-day  
239 Onge (Figures 3A, S21-S23). For the highest-coverage Group 1 sample, allowing for one  
240 migration, *TreeMix* fits Papuans as receiving admixture from Denisovans, while the second  
241 migration shows East Asian populations as resulting from admixture between Tianyuan and  
242 Onge.

243 We also performed a more supervised form of admixture graph modeling using  
244 *qpGraph* (36) (SOM9). We began with a skeletal framework containing chimpanzee (PanTro2,  
245 EPO alignment from Ensembl 71 (56, 57)), Denisova (58), Altai Neanderthal (59), Kostenki-14  
246 (60), Mbuti, Onge, Ami and Papuan, fitting a graph based on results from Lipson and Reich  
247 (61) and well-supported D-statistics (SOM7). When not including Tianyuan, we find that the



248 Onge-Papuan-Ami split is hard to resolve (Figure S33), in agreement with Lipson and Reich  
249 (61). However, when including Tianyuan (Figure S34), we find that a best fit occurs when Ami  
250 (or Han) are modelled as an admixed group, with ancestry from a population related to  
251 Tianyuan and a population related to Onge (worst-fitting  $Z = -3.564$ ). In support of this graph  
252 assignment, we find that  $D(\text{Ami, Onge, Tianyuan, Mbuti}) = 0.0239$  ( $Z = 5.148$ ), while Papuan  
253 and Onge are a clade with respect to Tianyuan:  $D(\text{Papuan, Onge, Tianyuan, Mbuti}) = -0.0047$   
254 ( $Z = -0.886$ ). We then added either La368 or Ma911 to the graph. In agreement with the  
255 *TreeMix* results, we find that La368 and Ma911 are each best modeled as a sister group to  
256 Onge (Figures S35 and S36, worst-fitting  $Z = 3.372$  and  $3.803$ , respectively).

257 We then used *qpWave/qpAdm* (62, 63) to determine if La368 and Ma911 can be  
258 modelled as a linear combination of ancestries from Papuans, Onge and/or Tianyuan without  
259 the need to invoke partial ancestry from a population that may have split from them before  
260 these populations split from each other. As outgroup populations, we used Yoruba (64), Ust-  
261 Ishim (65), Kostenki-14 (60), Mal'ta (66), Afontova Gora 3, Vestonice 16, El Mirón and  
262 Villabruna (67). All best 3-way and 2-way combinations for La368 are not feasible (have  
263 negative admixture weights). There are two 1-way possibilities (La368 as a sister group to  
264 either Onge or Papuans) that are feasible and are good fits ( $P = 0.37$  and  $P = 0.27$ ,  
265 respectively), and this is somewhat expected as Onge and Papuans are sister clades to each  
266 other - barring Denisovan introgression into Papuans. When performing the same analysis on  
267 Ma911 as the target population, we find that all the best 3-way and 2-way combinations are  
268 also infeasible and the only good 1-way fit is with Onge ( $P = 0.49$ ). Modelling Ami as a linear  
269 combination of the same three source populations results in any of the 3-, 2- or 1-way fits  
270 being feasible and good fits, but the best fit is found in the 2-way combination of Tianyuan and  
271 Onge ( $P = 0.98$ ).

272 When modeling the Mlabri-like Group 2 in *TreeMix*, we see that the two samples with  
273 the highest coverage in this group (La364 and Ma912) form a clade, resulting from an  
274 admixture event between the ancestral populations of present-day East Asians (Han/Ami) and  
275 the ancestors of La368 (Figures 3B, S24-27). Despite the low SNP overlap (~20,000 SNPs)  
276 when including the Group 1 and 2 samples from Laos and Malaysia, (La368, Ma911, La364,  
277 Ma912), at 3 migrations, *TreeMix* residuals suggest that the Onge-like ancestry in Malaysia  
278 and Laos is a result of local admixture (Figure S27, SOM8). Additional data and higher

279 coverage samples from these regions are needed to better support a ‘local admixture’ model:  
280 including all four low-depth genomes in the same admixture graph results in only 17,286  
281 overlapping SNPs (including transitions), which makes inference difficult. The Jehai are best  
282 fitted as an admixed population between Group 2 (Ma912) and the branch leading to present-  
283 day Onge and La368 (Figure 3C, S28). ISEA ancient samples from Indonesia (Group 5) and  
284 Borneo (Group 6) are best modelled as an admixed population carrying the signature of Group  
285 2 (Figure 3D, Figures S29-33), supporting a previously reported mainland component in ISEA  
286 complementary to the well-documented Austronesian expansion (47). For the ISEA samples  
287 (Group 5 - In662 and Group 6 - Ma554), when a more basal migration event occurs, it  
288 originates from the Papuan branch, rather than the Onge branch as seen in MSEA.

289 Consistent with the *TreeMix* results, La364 in *qpGraph* is best modeled as a mixture of  
290 a population ancestral to Ami and the Group 1 / Onge-like population (Figure 3E, worst-fitting  
291  $Z = 3.667$ ). Additionally, we find the best model for present-day Dai populations is a mixture  
292 of Group 2 individuals and an additional pulse of admixture from East Asians (Figure S37,  
293 worst-fitting  $Z = 3.66$ ).

294 This is the first study to reconstruct the population history of SEA using ancient DNA.  
295 We find that the genetic diversity found in present day SEA populations derives from at least  
296 four prehistoric population movements by the Hoabinhians, an “Austroasiatic-like” population,  
297 the Austronesians and, finally, additional EA populations into MSEA. We further show that the  
298 ancient mainland Hoabinhians (Group 1) shared ancestry with present-day Onge of the  
299 Andaman Islands and the Jehai of peninsular Malaysia. These results, together with the  
300 absence of significant Denisovan ancestry in these populations, suggest that the Denisovan  
301 admixture observed in Papuans occurred after their ancestors split from the ancestors of the  
302 Onge, Jehai and the ancient Hoabinhians. This is also consistent with the presence of  
303 substantial Denisovan admixture in the Mamanwa from the Philippines, which are best  
304 modeled as resulting from an admixture between Austronesians and Papuans, not Onge (61).

305 Consistent with the Two Layer model, we observe a dramatic change in ancestry by 4  
306 kya (Group 2) which coincides with the introduction of farming, and thus supports models that  
307 posit a significant demographic expansion from EA into SEA during the Neolithic transition.  
308 Group 2 are the oldest samples with distinctive EA ancestry that we find. The most closely  
309 related present-day populations to Group 2 are the Mlabri and Htin - the Austroasiatic hill

310 tribes of Thailand - which is in agreement with hypotheses of an early Austroasiatic farmer  
311 expansion into the region. They also share ancestry with the Temuan and Jehai of Peninsular  
312 Malaysia and populations of Western Indonesia, supporting an Austroasiatic (“Western  
313 Route”) expansion into ISEA (post-Hoabinhian, pre-Austronesian), as previously proposed  
314 based on linguistic and archaeological grounds (27, 49, 68). Furthermore, a recent study also  
315 identified populations of Bali and Java as the groups in ISEA with the highest frequency of  
316 mainland SEA ancestry (47), also reflected in the large amounts of shared drift between Group  
317 2 and the Javanese that we observe (Figure S13). The extent and nature of this Austroasiatic  
318 expansion into western Indonesia prior to the Austronesian expansion could be resolved by  
319 sequencing ancient genomes from ISEA prior to the Austronesian expansion.

320 By around 2 kya, all ancient mainland samples carry additional EA ancestry  
321 components that are absent in Group 2. Within the variation of these recent samples, we find  
322 two clusters of ancestry, possibly representing independent EA migrations into mainland SEA.  
323 Group 3 has affinities to the Hmong, the Dai from China, the Thai from Thailand and the Kinh  
324 from Vietnam, while Group 4 individuals - found only in inland regions - have affinities to  
325 Austroasiatic Thai and Chinese speakers. Finally, we also find evidence for the arrival of  
326 Austronesian ancestry into the Philippines by 1.8 kya (Group 6) and into Indonesia by 2.1 kya  
327 (Group 5). By 2 kya, the population structure in MSEA was very similar to that among present-  
328 day individuals. Despite observing a clear change in genetic structure coinciding with the  
329 transition from the Hoabinhian hunter-gatherers to Neolithic farmers, we also see a degree of  
330 local continuity at all sites at different points in time, suggesting that incoming waves of  
331 migration did not completely replace the previous occupants in each area (Figure 4).

332 This study demonstrates that whole-genome capture is an efficient supplementary  
333 approach for retrieving whole genomes from the fossil skeletal and dental remains found in the  
334 tropics. As target enrichment inevitably results in subsampling library fragments, it is most  
335 useful for (combined) libraries with high underlying complexity. We found a median 7.5 fold  
336 enrichment, reducing the sequencing costs proportionally. By enriching the human DNA  
337 content, we were able to acquire whole-genome data from selected samples in which the low  
338 proportion of endogenous DNA would have been previously prohibitive. The whole genome  
339 approach which we have employed here combines shotgun sequencing and capture in order to  
340 maximise the potential of ancient samples.

341 The clear genetic distinction between the Onge-like Hoabinhian and EA Neolithic  
342 demonstrated by this study provides an overwhelming support for the Two Layer model and  
343 indicates that in SEA, like in Europe, the onset of agriculture was accompanied by a  
344 demographic transition. However, on a more local level, our results point toward admixture  
345 events in northern Laos and Peninsula Malaysia between the two dispersal layers. We also  
346 show that the Hoabinhians of the first dispersal contributed a degree of ancestry to the  
347 incoming EA populations, which may have also resulted in the passing on of some phenotypic  
348 characteristics detected by proponents of the Continuity model. Finally, our results reveal that  
349 the appearance of these Austroasiatic farmers at around 4 kya was followed by multiple  
350 migrations of distinct EA ancestry. These subsequent migrations made significant contributions  
351 to the diversity of human populations in present-day SEA.

352

### 353 **Methods:**

354

### 355 **Samples**

356

357 We screened ancient samples from across SEA. We prioritized petrous bone, because  
358 of its favorable DNA preservation (69). Most of the samples were processed at the Centre for  
359 GeoGenetics, University of Copenhagen, with a few at Griffith University (Long Long Rak,  
360 Thailand; Th387, Th391, Th392, Th389, Th126, Th127, Th238, Th248), in dedicated clean  
361 laboratories following strict ancient DNA guidelines (69–71). Material was sampled as  
362 described in Hansen et al. (69). To minimize risk of contamination from handling, we  
363 performed a pre-digestion step (72). DNA extraction was done as in (73) followed by dual-  
364 indexed libraries building and amplification (74). Adapter-dimers were removed where  
365 necessary, using AMPure beads.

366

### 367 **Sequencing, Mapping and Genotyping**

368

369 Sequencing was performed on Illumina HiSeq2500 (ver. 4) or HiSeq4000 instruments  
370 (81bp single-read) using bcl2fastq de-multiplexing. Adapters were trimmed using

371 *AdapterRemoval* v2.2.2 (75), and mapped to the human reference genome (hg19, build 37)  
372 using BWA (76, 77) (SOM3).

373 To minimize batch effects, we obtained genotypes for all individuals from a  
374 combination of published BAM files from previous studies and BAM files produced in this  
375 study. We genotyped genomes that had low coverage or were obtained from targeted capture  
376 by selecting the majority allele for the genomic position, looking only at reads with mapping  
377 quality  $\geq 30$  and base quality  $\geq 30$ . If both alleles were present at a site with equal coverage, a  
378 random allele was selected. High-coverage genomes were genotyped as in Sikora et al. (78).  
379 All analyses were restricted to regions that were within the 1000 Genomes Phase 3 (79) strict  
380 accessibility mask  
381 ([ftp://ftp.1000genomes.ebi.ac.uk/vol1/ftp/release/20130502/supporting/accessible\\_genome\\_ma](ftp://ftp.1000genomes.ebi.ac.uk/vol1/ftp/release/20130502/supporting/accessible_genome_masks/20141020.strict_mask.whole_genome.bed)  
382 [sks/20141020.strict\\_mask.whole\\_genome.bed](ftp://ftp.1000genomes.ebi.ac.uk/vol1/ftp/release/20130502/supporting/accessible_genome_masks/20141020.strict_mask.whole_genome.bed)), and outside repeat regions (UCSC genome  
383 browser simpleRepeat table).

384

### 385 **Damage/Contamination**

386

387 Using *mapDamage* v2 (80), we verified that all ancient samples displayed signatures of  
388 cytosine deamination and short fragment lengths, both typical of ancient DNA. For all samples  
389 in Table 1, contamination estimates obtained using *contamMix* (65) were minimal (MAP  
390 probability of authentic ancient DNA material = 0.94-0.99%, depending on the sample), while  
391 some of the very low coverage samples that were not sequenced to genome-wide depth had  
392 elevated contamination rates (Table S3). When practical, extracts were USER-treated (81) for  
393 deep sequencing after damage patterns were identified from screening results.

394

### 395 **Reference Panels**

396

397 We assembled two panels for different types of analyses. Initial analyses were  
398 undertaken using the HUGO Pan-Asian SNP Database (30) (1,744 individuals; 50,796 SNPs)  
399 and Onge from the Simons Genome Diversity Panel (SGDP) (64), resulting in a panel  
400 maximising populations, at the expense of a lower SNP number, with 50,136 overlapping  
401 SNPs (hereafter the “Pan-Asia panel”). We assembled a second panel using whole genomes

402 from the SGDP, limiting to the 2,240k capture SNPs from Yang et al. (45). We used the first  
403 panel for ADMIXTURE / *fastNGSadmix* analyses and PCA, as well as  $f_3$  statistics. We used  
404 the second panel for more parameter-rich modelling.

405

## 406 **Principal Component Analysis**

407

408 We performed a principal component analysis using *smartpca* v1600 implemented in  
409 the *Eigensoft* package (82) on the SNP covariance matrix of genomes from the Pan-Asia panel.  
410 We then projected all our ancient SEA samples onto the first two principal components (40)  
411 (SOM4).

412

## 413 **ADMIXTURE**

414

415 We ran ADMIXTURE v1.3.0 (41) from  $K = 1$  to  $K = 13$  on the Pan-Asia Panel and the  
416 SGDP panel, after LD-pruning in PLINK (83), yielding 35,042 SNPs for analysis. To get  
417 standard errors for parameter estimates, we obtained 200 bootstrap replicates in each run. We  
418 then modeled low-coverage ancient populations based on the reference components inferred by  
419 ADMIXTURE, using *fastNGSadmix* (43). To visualise the admixture plots we used *pong* (84).  
420 Throughout this study, we generally refer to the colors corresponding to the ancestry  
421 components assuming  $K=13$ , unless otherwise stated.

422

## 423 ***f* and *D* statistics**

424

425 We computed *f* and *D* statistics to measure the amount of shared drift between two  
426 populations, and to test gene-flow and treeness hypotheses, as detailed in Patterson et al. (36).  
427 For both analyses, we estimated standard errors through a weighted block jackknife procedure  
428 over 5Mb-blocks. For *D* statistics, we restricted the analysis to transversion polymorphisms in  
429 order to minimize potential bias introduced by differential error rates in ancient samples  
430 (mostly a consequence of *post-mortem* ancient DNA damage and low depth).

431

## 432 **TreeMix**



433

434 We performed unsupervised admixture graph fitting of our ancient and present-day  
435 samples using *TreeMix* v1.13 (55) on the data. We used high coverage genomes from  
436 Denisovan, Mbuti, Kostenki, Papuan, Onge, Papuan, Tianyuan, Han and Ami as a base set of  
437 populations, and rooted the graph using Denisova as the outgroup. For each test, we only  
438 considered sites where all analysed populations had at least one individual with non-missing  
439 data and grouped SNPs in 5Mb blocks (-k parameter) to account for linkage disequilibrium.  
440 We observed that including transitions for ancient samples caused biases in inference and so  
441 removed transitions in all analyses. We show all graphs fitted in SOM8.

442

### 443 **qpGraph**

444

445 We ran *qpGraph* v6100 from the *Admixtools* package (36), following parameter  
446 settings as in Lipson and Reich (61). We used fitted graphs with chimpanzee at the root, set  
447 “outpop” to be “NULL” to prevent use from specifying a particular outgroup population in  
448 which SNPs must be polymorphic, used a block size of 0.05 Morgans for the jackknife  
449 procedure, and used the full matrix form of the objective function, with “diag” set to 0.0001.  
450 Finally, we set a Z-score = 3 as the cutoff to label a statistic as an outlier. For further details,  
451 see SOM9.

452

### 453 **Author Contributions:**

454

455 EW initiated the study. EW, DML, LV, LO, HM and FD designed the study. EW and  
456 DML supervised the overall project, while LV, FD, FR, VS, TS, MMS, RS, HMN, CH, KW,  
457 EPE, JCG, RK, HB and CP supervised specific aspects of the project. HM, LV, FD, UGW,  
458 CD, VS, TS, MMS, RS, SK, PL, HMN, HCH, TMT, THN, SS, KW, AMB, PD, JLP, LS, EPE,  
459 NAT, JCG, RK, HB and CP excavated, curated, sampled and/or described samples. HM, LV,  
460 ASO, SW, PBD, SR and TH produced data for analysis. HM, FR, LV, JVMM, CD, SW, AM,  
461 LO and MS analysed or assisted in the analysis of data. HM, FR, LV, FD, AM, LO, MS, CH,  
462 DML and EW interpreted the results. HM, FR, LV, FD, MML, RAF, CH, DML, EW wrote the  
463 manuscript with considerable input from JVMM, CD, SW, AP, VS, TS, MMS, RS, HMN,

464 HCH, THN, KW, TH and MS. All authors discussed the results and contributed to the final  
465 manuscript.

466

#### 467 **Acknowledgements:**

468

469 We thank the National High-throughput DNA Sequencing Centre (Copenhagen  
470 Denmark) for expert advice and sequencing of samples, the Duckworth Laboratory, University  
471 of Cambridge, for permission to sample material in their care, and Kristian Gregersen for  
472 making casts of teeth before sampling. This work was supported by the Lundbeck Foundation,  
473 the Danish National Research Foundation, and the KU2016 program. HM is supported by the  
474 George Murray Scholarship (University of Adelaide). RS thanks the Thailand Research Fund  
475 (TRF) for their support (Grants RTA6080001 and RDG55H0006). MML is supported by the  
476 ERC award 295907. DML was supported by ARC Grants LP120200144, LP150100583 and  
477 DP170101313. EW thanks St. John's College, University of Cambridge, for providing an  
478 inspiring environment for scientific thought.

479

480

#### 481 **References**

482

- 483 1. F. Demeter *et al.*, Early Modern Humans from Tam Pà Ling, Laos: Fossil Review and  
484 Perspectives. *Curr. Anthropol.* **58**, S527–S538 (2017).
- 485 2. L. Shackelford *et al.*, Additional evidence for early modern human morphological diversity in  
486 Southeast Asia at Tam Pa Ling, Laos. *Quat. Int.* **466**, 93–106 (2018).
- 487 3. K. E. Westaway *et al.*, An early modern human presence in Sumatra 73,000–63,000 years ago.  
488 *Nature.* **548**, 322–325 (2017).
- 489 4. C. Higham, *Early Mainland Southeast Asia: From First Humans to Angkor* (River Books Press  
490 Dist A C, 2014).
- 491 5. M. Colani, *L'âge de la Pierre dans la Province de hoa-binh (Tonkin): par Madeleine Colani*  
492 (Imprimerie d'Extrême-Orient, 1927).
- 493 6. E. Patole-Edoumba *et al.*, Evolution of the Hoabinhian techno-complex of Tam Hang rock shelter  
494 in Northeastern Laos. *Archaeological Discovery.* **3**, 140 (2015).
- 495 7. V. T. Ha, H. A. Van Tan, The Hoabinhian and before. *Bulletin of the Indo-Pacific Prehistory*  
496 *Association.* **16** (1997), doi:10.7152/bippa.v16i0.11643.

- 497 8. C. G. Turner 2nd, Teeth and prehistory in Asia. *Sci. Am.* **260**, 88–91, 94–6 (1989).
- 498 9. C. G. Turner 2nd, Major features of Sundadonty and Sinodonty, including suggestions about East  
499 Asian microevolution, population history, and late Pleistocene relationships with Australian  
500 aboriginals. *Am. J. Phys. Anthropol.* **82**, 295–317 (1990).
- 501 10. C. G. Turner, in *The evolution and dispersal of modern humans in Asia*, T. Akazawa, K. Aoki K.,  
502 T. Kimura, Ed. (Kokusensha, 1992), pp. 415–443.
- 503 11. T. Hanihara, Negritos, Australian Aborigines, and the “proto-sundadont” dental pattern: The basic  
504 populations in East Asia, V. *Am. J. Phys. Anthropol.* **88**, 183–196 (1992).
- 505 12. T. Hanihara, Craniofacial Features of Southeast Asians and Jomonese: A Reconsideration of Their  
506 Microevolution Since the Late Pleistocene. *Anthropol. Sci.* **101**, 25–46 (1993).
- 507 13. T. Hanihara, Population prehistory of East Asia and the Pacific as viewed from craniofacial  
508 morphology: The basic populations in East Asia, VII. *Am. J. Phys. Anthropol.* **91**, 173–187 (1993).
- 509 14. T. Hanihara, Cranial Morphological Contrasts between Negritos, Australians, and Neighboring  
510 Populations. *Anthropol. Sci.* **101**, 389–404 (1993).
- 511 15. T. Hanihara, Craniofacial continuity and discontinuity of Far Easterners in the Late Pleistocene  
512 and Holocene. *J. Hum. Evol.* **27**, 417–441 (1994).
- 513 16. T. Hanihara, in *Bioarchaeology of Southeast Asia* (2006), pp. 91–111.
- 514 17. M. Pietrusewsky, Japan, Asia and the Pacific: a multivariate craniometric investigation. *Japanese*  
515 *as a Member of the Asian and Pacific Populations. International Research Center for Japanese*  
516 *Studies, Kyoto*, 9–52 (1992).
- 517 18. M. Pietrusewsky, Pacific-Asian Relationships: A Physical Anthropological Perspective. *Oceanic*  
518 *Linguistics.* **33**, 407 (1994).
- 519 19. M. Pietrusewsky, in *Interdisciplinary Perspectives on the Origins of the Japanese, International*  
520 *Symposium* (1996), pp. 65–104.
- 521 20. M. Pietrusewsky, in *The peopling of East Asia: Putting together archaeology, linguistics and*  
522 *genetics*, L. Sagart, R. Blench, A. Sanchez-Mazos, Eds. (2005), pp. 201–229.
- 523 21. M. Pietrusewsky, in *Bioarchaeology of Southeast Asia* (2006), pp. 59–90.
- 524 22. P. S. Bellwood, The colonization of the Pacific: some current hypotheses. *The colonization of the*  
525 *Pacific: a genetic trail* (1989) (available at <https://ci.nii.ac.jp/naid/10031057350/>).
- 526 23. P. Bellwood, Early agriculture and the dispersal of the southern Mongoloids. *Prehistoric*  
527 *mongoloid dispersals*, 287–302 (1996).
- 528 24. Y. Zheng, G. W. Crawford, L. Jiang, X. Chen, Rice Domestication Revealed by Reduced  
529 Shattering of Archaeological rice from the Lower Yangtze valley. *Sci. Rep.* **6**, 28136 (2016).
- 530 25. D. Q. Fuller *et al.*, The domestication process and domestication rate in rice: spikelet bases from  
531 the Lower Yangtze. *Science.* **323**, 1607–1610 (2009).

- 532 26. Z. Yunfei *et al.*, Rice fields and modes of rice cultivation between 5000 and 2500 BC in east  
533 China. *J. Archaeol. Sci.* **36**, 2609–2616 (2009).
- 534 27. P. Sidwell, R. Blench, The Austroasiatic urheimat: the southeastern riverine hypothesis. Dynamics  
535 of Human diversity, the case of mainland Southeast Asia. *Pacific Linguistics.* **14**, 315–343 (2011).
- 536 28. D. Q. Fuller *et al.*, Consilience of genetics and archaeobotany in the entangled history of rice.  
537 *Archaeol. Anthropol. Sci.* **2**, 115–131 (2010).
- 538 29. D. Bulbeck, Craniodental affinities of Southeast Asia’s “negritos” and the concordance with their  
539 genetic affinities. *Hum. Biol.* **85**, 95–133 (2013).
- 540 30. HUGO Pan-Asian SNP Consortium *et al.*, Mapping human genetic diversity in Asia. *Science.* **326**,  
541 1541–1545 (2009).
- 542 31. T. A. Jinam *et al.*, Evolutionary history of continental southeast Asians: “early train” hypothesis  
543 based on genetic analysis of mitochondrial and autosomal DNA data. *Mol. Biol. Evol.* **29**, 3513–  
544 3527 (2012).
- 545 32. T. A. Jinam *et al.*, Discerning the Origins of the Negritos, First Sundaland People: Deep  
546 Divergence and Archaic Admixture. *Genome Biol. Evol.* **9**, 2013–2022 (2017).
- 547 33. R. D. Harter, Acid soils of the tropics. *Echo Technical Note. USA* (2007).
- 548 34. M. Rasmussen *et al.*, Ancient human genome sequence of an extinct Palaeo-Eskimo. *Nature.* **463**,  
549 757–762 (2010).
- 550 35. L. Orlando *et al.*, Recalibrating Equus evolution using the genome sequence of an early Middle  
551 Pleistocene horse. *Nature.* **499**, 74–78 (2013).
- 552 36. N. Patterson *et al.*, Ancient admixture in human history. *Genetics.* **192**, 1065–1093 (2012).
- 553 37. J. K. Pickrell, D. Reich, Toward a new history and geography of human genes informed by ancient  
554 DNA. *Trends Genet.* **30**, 377–389 (2014).
- 555 38. L. Orlando, M. T. P. Gilbert, E. Willerslev, Reconstructing ancient genomes and epigenomes. *Nat.*  
556 *Rev. Genet.* **16**, 395–408 (2015).
- 557 39. G. Abraham, M. Inouye, Fast Principal Component Analysis of Large-Scale Genome-Wide Data  
558 (2014), , doi:10.1101/002238.
- 559 40. P. Skoglund *et al.*, Origins and genetic legacy of Neolithic farmers and hunter-gatherers in Europe.  
560 *Science.* **336**, 466–469 (2012).
- 561 41. D. H. Alexander, J. Novembre, K. Lange, Fast model-based estimation of ancestry in unrelated  
562 individuals. *Genome Res.* **19**, 1655–1664 (2009).
- 563 42. L. Skotte, T. S. Korneliussen, A. Albrechtsen, Estimating individual admixture proportions from  
564 next generation sequencing data. *Genetics.* **195**, 693–702 (2013).
- 565 43. E. Jørsboe, K. Hanghøj, A. Albrechtsen, fastNGSadmix: admixture proportions and principal  
566 component analysis of a single NGS sample. *Bioinformatics.* **33**, 3148–3150 (2017).

- 567 44. D. Lawson, L. van Dorp, D. Falush, A tutorial on how (not) to over-interpret  
568 STRUCTURE/ADMIXTURE bar plots. *bioRxiv* (2016), doi:10.1101/066431.
- 569 45. M. A. Yang *et al.*, 40,000-Year-Old Individual from Asia Provides Insight into Early Population  
570 Structure in Eurasia. *Curr. Biol.* **27**, 3202–3208.e9 (2017).
- 571 46. Zhang Chi, Z. Chi, H.-C. Hung, The Neolithic of Southern China—Origin, Development, and  
572 Dispersal. *Asian Perspectives.* **47**, 299–329 (2009).
- 573 47. G. Hudjashov *et al.*, Complex Patterns of Admixture across the Indonesian Archipelago. *Mol. Biol.*  
574 *Evol.* **34**, 2439–2452 (2017).
- 575 48. M. Lipson *et al.*, Reconstructing Austronesian population history in Island Southeast Asia. *Nat.*  
576 *Commun.* **5**, 4689 (2014).
- 577 49. T. Simanjuntak, in *New Perspectives in Southeast Asian and Pacific Prehistory* (2017), pp. 201–  
578 211.
- 579 50. R. Shoocondej, *Coffin culture of Thailand in Southeast Asian context* (Charansanitwongse Press,  
580 2017).
- 581 51. N. Rustagi *et al.*, Extremely low-coverage whole genome sequencing in South Asians captures  
582 population genomics information. *BMC Genomics.* **18**, 396 (2017).
- 583 52. A. Basu, N. Sarkar-Roy, P. P. Majumder, Genomic reconstruction of the history of extant  
584 populations of India reveals five distinct ancestral components and a complex structure.  
585 *Proceedings of the National Academy of Sciences.* **113**, 1594–1599 (2016).
- 586 53. P. Skoglund *et al.*, Genetic evidence for two founding populations of the Americas. *Nature.* **525**,  
587 104–108 (2015).
- 588 54. M. Raghavan *et al.*, Genomic evidence for the Pleistocene and recent population history of Native  
589 Americans. *Science.* **349**, aab3884 (2015).
- 590 55. J. K. Pickrell, J. K. Pritchard, Inference of population splits and mixtures from genome-wide allele  
591 frequency data. *PLoS Genet.* **8**, e1002967 (2012).
- 592 56. The Chimpanzee Sequencing and Analysis Consortium, Initial sequence of the chimpanzee  
593 genome and comparison with the human genome. *Nature.* **437**, 69–87 (2005).
- 594 57. B. Paten, J. Herrero, K. Beal, S. Fitzgerald, E. Birney, Enredo and Pecan: genome-wide  
595 mammalian consistency-based multiple alignment with paralogs. *Genome Res.* **18**, 1814–1828  
596 (2008).
- 597 58. M. Meyer *et al.*, A high-coverage genome sequence from an archaic Denisovan individual.  
598 *Science.* **338**, 222–226 (2012).
- 599 59. K. Prüfer *et al.*, The complete genome sequence of a Neanderthal from the Altai Mountains.  
600 *Nature.* **505**, 43–49 (2014).
- 601 60. A. Seguin-Orlando *et al.*, Paleogenomics. Genomic structure in Europeans dating back at least  
602 36,200 years. *Science.* **346**, 1113–1118 (2014).

- 603 61. M. Lipson, D. Reich, A working model of the deep relationships of diverse modern human genetic  
604 lineages outside of Africa. *Mol. Biol. Evol.*, msw293 (2017).
- 605 62. I. Lazaridis *et al.*, Ancient human genomes suggest three ancestral populations for present-day  
606 Europeans. *Nature*. **513**, 409–413 (2014).
- 607 63. D. Reich *et al.*, Reconstructing Native American population history. *Nature*. **488**, 370–374 (2012).
- 608 64. S. Mallick *et al.*, The Simons Genome Diversity Project: 300 genomes from 142 diverse  
609 populations. *Nature*. **538**, 201–206 (2016).
- 610 65. Q. Fu *et al.*, Genome sequence of a 45,000-year-old modern human from western Siberia. *Nature*.  
611 **514**, 445–449 (2014).
- 612 66. M. Raghavan *et al.*, Upper Palaeolithic Siberian genome reveals dual ancestry of Native  
613 Americans. *Nature*. **505**, 87–91 (2014).
- 614 67. Q. Fu *et al.*, The genetic history of Ice Age Europe. *Nature*. **534**, 200–205 (2016).
- 615 68. P. Bellwood, The prehistory of Island Southeast Asia: A multidisciplinary review of recent  
616 research. *Journal of World Prehistory*. **1**, 171–224 (1987).
- 617 69. H. B. Hansen *et al.*, Comparing Ancient DNA Preservation in Petrous Bone and Tooth Cementum.  
618 *PLoS One*. **12**, e0170940 (2017).
- 619 70. M. T. P. Gilbert, H.-J. Bandelt, M. Hofreiter, I. Barnes, Assessing ancient DNA studies. *Trends*  
620 *Ecol. Evol.* **20**, 541–544 (2005).
- 621 71. E. Willerslev, A. Cooper, Ancient DNA. *Proc. Biol. Sci.* **272**, 3–16 (2005).
- 622 72. P. de B. Damgaard *et al.*, Improving access to endogenous DNA in ancient bones and teeth (2015),  
623 , doi:10.1101/014985.
- 624 73. M. E. Allentoft *et al.*, Population genomics of Bronze Age Eurasia. *Nature*. **522**, 167–172 (2015).
- 625 74. M. Meyer, M. Kircher, Illumina sequencing library preparation for highly multiplexed target  
626 capture and sequencing. *Cold Spring Harb. Protoc.* **2010**, db.prot5448 (2010).
- 627 75. M. Schubert, S. Lindgreen, L. Orlando, AdapterRemoval v2: rapid adapter trimming,  
628 identification, and read merging. *BMC Res. Notes*. **9**, 88 (2016).
- 629 76. M. Schubert *et al.*, Improving ancient DNA read mapping against modern reference genomes.  
630 *BMC Genomics*. **13**, 178 (2012).
- 631 77. G. A. Van der Auwera *et al.*, in *Current Protocols in Bioinformatics* (2013), pp. 11.10.1–11.10.33.
- 632 78. M. Sikora *et al.*, Ancient genomes show social and reproductive behavior of early Upper  
633 Paleolithic foragers. *Science*. **358**, 659–662 (2017).
- 634 79. 1000 Genomes Project Consortium *et al.*, A global reference for human genetic variation. *Nature*.  
635 **526**, 68–74 (2015).
- 636 80. H. Jónsson, A. Ginolhac, M. Schubert, P. L. F. Johnson, L. Orlando, mapDamage2.0: fast



- 637 approximate Bayesian estimates of ancient DNA damage parameters. *Bioinformatics*. **29**, 1682–  
638 1684 (2013).
- 639 81. A. W. Briggs *et al.*, Removal of deaminated cytosines and detection of in vivo methylation in  
640 ancient DNA. *Nucleic Acids Res.* **38**, e87 (2010).
- 641 82. N. Patterson, A. L. Price, D. Reich, Population structure and eigenanalysis. *PLoS Genet.* **2**, e190  
642 (2006).
- 643 83. S. Purcell *et al.*, PLINK: A Tool Set for Whole-Genome Association and Population-Based  
644 Linkage Analyses. *Am. J. Hum. Genet.* **81**, 559–575 (2007).
- 645 84. A. A. Behr, K. Z. Liu, G. Liu-Fang, P. Nakka, S. Ramachandran, pong: fast analysis and  
646 visualization of latent clusters in population genetic data. *Bioinformatics*. **32**, 2817–2823 (2016).
- 647 85. L. Vinner *et al.*, Investigation of Human Cancers for Retrovirus by Low-Stringency Target  
648 Enrichment and High-Throughput Sequencing. *Sci. Rep.* **5**, 13201 (2015).
- 649 86. H. Li, R. Durbin, Fast and accurate short read alignment with Burrows-Wheeler transform.  
650 *Bioinformatics*. **25**, 1754–1760 (2009).
- 651 87. M. Schubert *et al.*, Characterization of ancient and modern genomes by SNP detection and  
652 phylogenomic and metagenomic analysis using PALEOMIX. *Nat. Protoc.* **9**, 1056–1082 (2014).
- 653 88. C. Der Sarkissian *et al.*, Evolutionary Genomics and Conservation of the Endangered Przewalski's  
654 Horse. *Curr. Biol.* **25**, 2577–2583 (2015).
- 655 89. A. W. Briggs *et al.*, Patterns of damage in genomic DNA sequences from a Neandertal. *Proc. Natl.*  
656 *Acad. Sci. U. S. A.* **104**, 14616–14621 (2007).
- 657 90. T. Daley, A. D. Smith, Predicting the molecular complexity of sequencing libraries. *Nat. Methods.*  
658 **10**, 325–327 (2013).
- 659 91. J. Z. Li *et al.*, Worldwide human relationships inferred from genome-wide patterns of variation.  
660 *Science*. **319**, 1100–1104 (2008).
- 661 92. M. L. Carpenter *et al.*, Pulling out the 1%: whole-genome capture for the targeted enrichment of  
662 ancient DNA sequencing libraries. *Am. J. Hum. Genet.* **93**, 852–864 (2013).
- 663 93. D. I. Cruz-Dávalos *et al.*, Experimental conditions improving in-solution target enrichment for  
664 ancient DNA. *Mol. Ecol. Resour.* **17**, 508–522 (2017).
- 665 94. J. M. Enk *et al.*, Ancient whole genome enrichment using baits built from modern DNA. *Mol.*  
666 *Biol. Evol.* **31**, 1292–1294 (2014).
- 667 95. J. Dabney, M. Meyer, Length and GC-biases during sequencing library amplification: a  
668 comparison of various polymerase-buffer systems with ancient and modern DNA sequencing  
669 libraries. *Biotechniques*. **52**, 87–94 (2012).
- 670 96. N. Tayles, S. E. Halcrow, T. Sayavongkhamdy, V. Souksavatdy, A prehistoric flexed human burial  
671 from Pha Phen, Middle Mekong Valley, Laos: its context in Southeast Asia. *Anthropol. Sci.* **123**,  
672 1–12 (2015).

- 673 97. D. Bulbeck, The Gua Cha burials. Concordance, chronology, demography (2001).
- 674 98. H. Matsumura, The population history of Southeast Asia viewed from morphometric analyses of  
675 human skeletal and dental remains. *of Southeast Asia. Cambridge University Press ...* (2006)  
676 (available at [https://books.google.com/books?hl=en&lr=&id=RrM7jKx-](https://books.google.com/books?hl=en&lr=&id=RrM7jKx-HysC&oi=fnd&pg=PA33&dq=population+history+Southeast+Asia+viewed+morphometric+analyses+human+skeletal+dental+remains+Matsumura&ots=YOKGYk9wSl&sig=huX6axFJ7_JkxlEcJl j1MNLPHI8)  
677 [HysC&oi=fnd&pg=PA33&dq=population+history+Southeast+Asia+viewed+morphometric+analy](https://books.google.com/books?hl=en&lr=&id=RrM7jKx-HysC&oi=fnd&pg=PA33&dq=population+history+Southeast+Asia+viewed+morphometric+analyses+human+skeletal+dental+remains+Matsumura&ots=YOKGYk9wSl&sig=huX6axFJ7_JkxlEcJl j1MNLPHI8)  
678 [ses+human+skeletal+dental+remains+Matsumura&ots=YOKGYk9wSl&sig=huX6axFJ7\\_](https://books.google.com/books?hl=en&lr=&id=RrM7jKx-HysC&oi=fnd&pg=PA33&dq=population+history+Southeast+Asia+viewed+morphometric+analyses+human+skeletal+dental+remains+Matsumura&ots=YOKGYk9wSl&sig=huX6axFJ7_JkxlEcJl j1MNLPHI8)  
679 [JkxlEcJl](https://books.google.com/books?hl=en&lr=&id=RrM7jKx-HysC&oi=fnd&pg=PA33&dq=population+history+Southeast+Asia+viewed+morphometric+analyses+human+skeletal+dental+remains+Matsumura&ots=YOKGYk9wSl&sig=huX6axFJ7_JkxlEcJl j1MNLPHI8)  
[j1MNLPHI8](https://books.google.com/books?hl=en&lr=&id=RrM7jKx-HysC&oi=fnd&pg=PA33&dq=population+history+Southeast+Asia+viewed+morphometric+analyses+human+skeletal+dental+remains+Matsumura&ots=YOKGYk9wSl&sig=huX6axFJ7_JkxlEcJl j1MNLPHI8)).
- 680 99. F. Demeter *et al.*, Tam Hang, a Palaeolithic site in Northern Laos: Preliminary results. *Asian*  
681 *Perspectives*. **48**, 291–308 (2010).
- 682 100. J. Fromaget, Les récentes découvertes anthropologiques dans les formations préhistoriques de  
683 la chaîne annamitique. *Government Printer, Singapore*, 51–59 (1940).
- 684 101. Nguyễn Kim Dung, Bùi Thu Phương, Bùi Văn Hiếu, Nguyễn Lâm Cường, Trần Trọng Hà,  
685 Nguyễn Thị Thủy, Khai quật di chỉ mộ táng ở Hòn Hai – Cô Tiên (Hạ Long) (Excavation Hon Hai  
686 Co Tien Cemetary site (Ha Long)). *Những phát hiện mới khảo cổ học (New Archaeological*  
687 *Discoveries)*, 155–158 (2005).
- 688 102. N. L. Cường, Hai bộ xương người cổ ở Nậm Tun (Lai Châu) (Two skeletons from Nam Tun  
689 (Lai Chau)). *Khảo cổ học*. **17**, 62–63 (1974).
- 690 103. V. H. Nguyễn Lâm Cường, Người cổ Nậm Tun (Nam Tun ancient human). *Khảo cổ học*. **17**,  
691 35–37 (1976).
- 692 104. A. Wipatayotin, Finding common ground. *Bangkok Post* (2018), (available at  
693 <https://www.bangkokpost.com/news/special-reports/1410471/finding-common-ground>).
- 694 105. R. Shoocongdej, in *Handbook of East and Southeast Asian Archaeology* (2017), pp. 97–109.
- 695 106. H.-C. Hung, thesis, Australian National University (2008).
- 696 107. H.-C. Hung, in *The First Islanders*, P. Bellwod, Ed. (Routledge, 2017), pp. 232–240.
- 697 108. F. Valentin, F. Déroit, M. J. T. Spriggs, S. Bedford, Early Lapita skeletons from Vanuatu show  
698 Polynesian craniofacial shape: Implications for Remote Oceanic settlement and Lapita origins.  
699 *Proc. Natl. Acad. Sci. U. S. A.* **113**, 292–297 (2016).
- 700 109. J.-C. Galipaud *et al.*, The Pain Haka burial ground on Flores: Indonesian evidence for a shared  
701 Neolithic belief system in Southeast Asia. *Antiquity*. **90**, 1505–1521 (2016).
- 702 110. K. Wiradnyana, Hoabinhian and Austronesia: The Root of Diversity in the Western Part of  
703 Indonesia. *European Scientific Journal, ESJ* (2016) (available at  
704 <https://www.listerz.com/index.php/esj/article/view/8388>).
- 705 111. S. Chia, Wood Coffin Burial of Kinabatangan, Sabah (2014).
- 706 112. A. McKenna *et al.*, The Genome Analysis Toolkit: a MapReduce framework for analyzing  
707 next-generation DNA sequencing data. *Genome Res.* **20**, 1297–1303 (2010).
- 708 113. R. E. Green *et al.*, A draft sequence of the Neandertal genome. *Science*. **328**, 710–722 (2010).

709 114. E. Y. Durand, N. Patterson, D. Reich, M. Slatkin, Testing for ancient admixture between  
710 closely related populations. *Mol. Biol. Evol.* **28**, 2239–2252 (2011).

711 115. D. Reich *et al.*, Denisova admixture and the first modern human dispersals into Southeast Asia  
712 and Oceania. *Am. J. Hum. Genet.* **89**, 516–528 (2011).

713

714

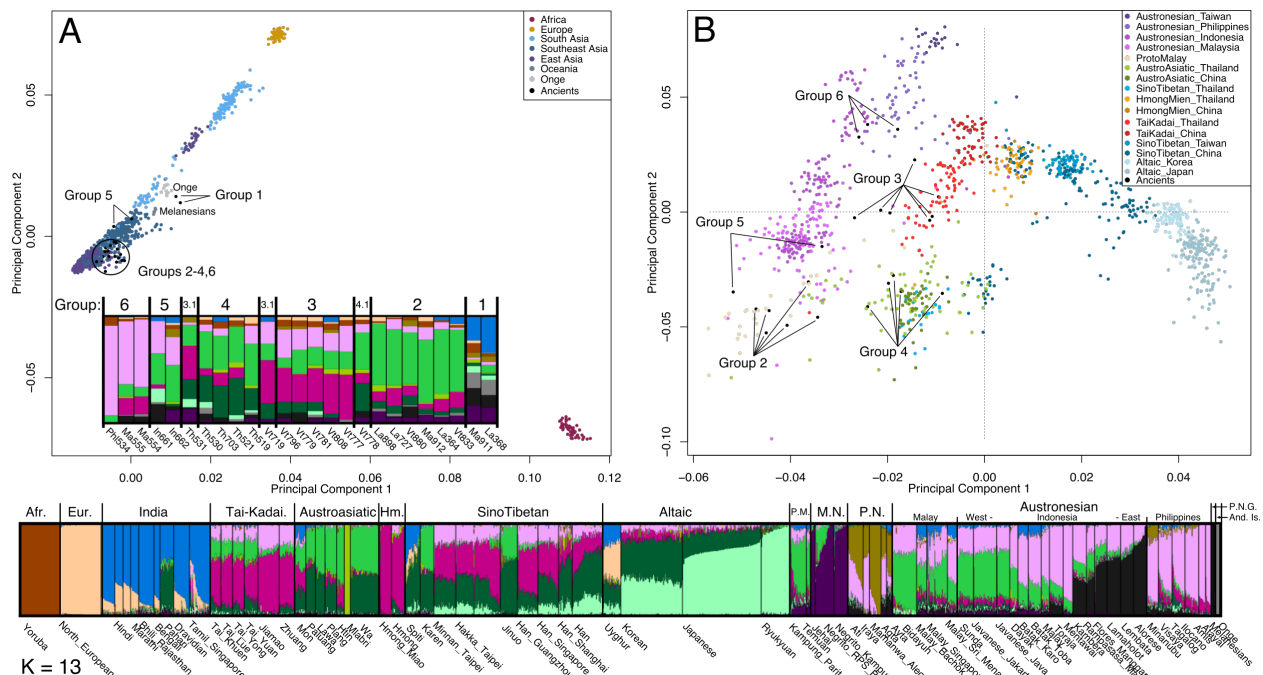

715 **Figure 1.** A) First two components of PCA of world-wide populations, including ancient SEA  
716 individual projections, computed using the Pan-Asia panel data. B) First two components of  
717 PCA of present-day and ancient individuals from mainland SEA, excluding Onge and the  
718 ancient Hoabinhians (Group 1), highlighting the differences in ancestry affinities among  
719 individuals from Groups 2-5. . Inset of panel A: *fastNGSadmix* plot for ancient samples,  
720 classified into groups of similar ancestry. Lower panel: *fastNGSadmix* plot at K=13, for all  
721 present-day samples, excluding SGDP genomes (see SOM5). We refer to the following  
722 present-day language speaking groups in relation to our ancient samples - Austroasiatic  
723 (Mlabri and Htin - bright green), Austronesian (Ami - pink) and Hmong (indigenous to the  
724 mountainous regions of China, Vietnam, Laos and Thailand - dark pink), along with a broad  
725 East Asian component (dark green).(Hm=Hmong Mien, P.M.=Proto Malay, MN = Malaysian  
726 'Negrito', PN = Philippines 'Negrito', P.N.G. = Papua New Guinea, And. Is. = Andaman  
727 Islands)  
728

729

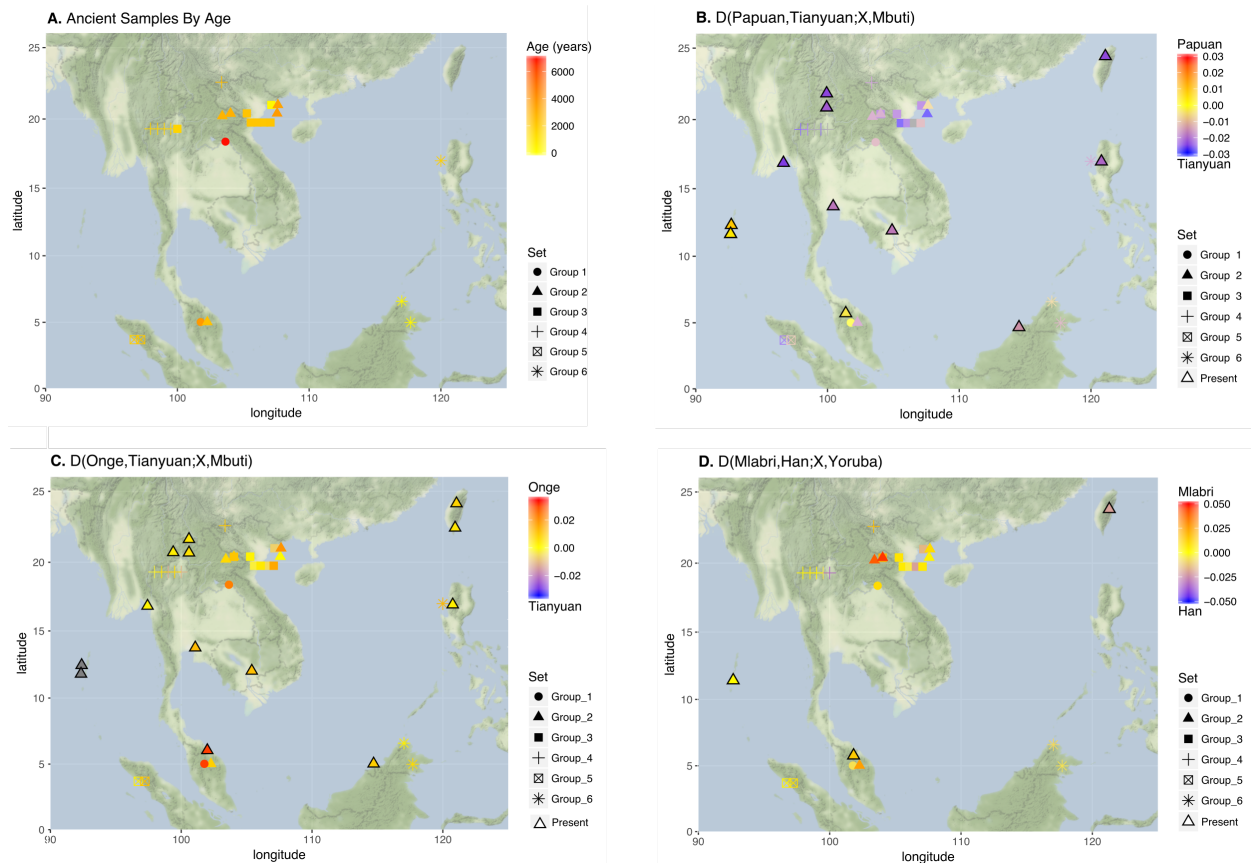

730

731 **Figure 2.** A) Estimated mean sample ages for ancient individuals. B) D-statistics testing for  
732 differential affinity between present-day Papuans and Tianyuan (2240k Panel). C) D-statistics  
733 testing for differential affinity between present-day Onge and Tianyuan (2240k Panel). D) D-  
734 statistics testing for differential affinity between present-day Mlabri and present-day Han  
735 Chinese (Pan-Asia Panel).

736

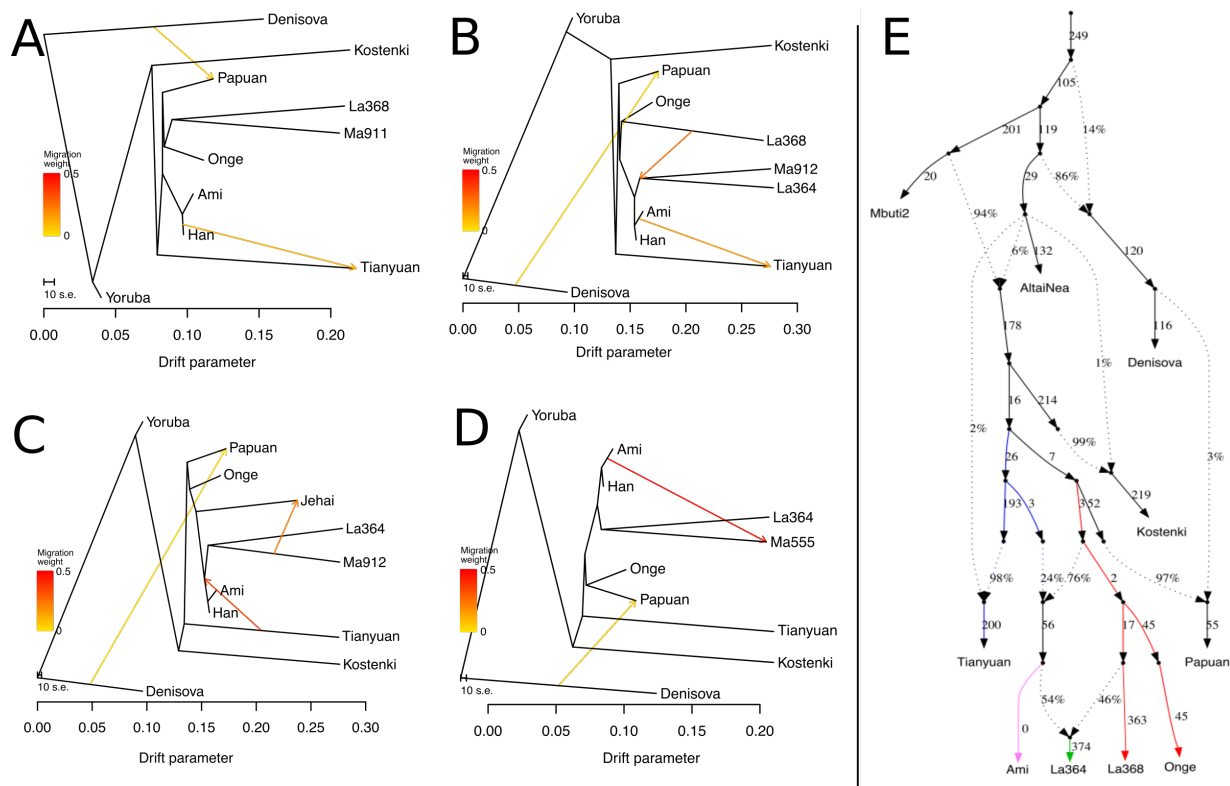

737

738 **Figure 3.** We used TreeMix to build admixture graphs combining present-day populations and  
 739 select ancient samples with high SNP coverage. A) A graph including both Group 1 samples  
 740 (Ma911 and La368) shows they can be fitted as sister groups with close affinities to present-  
 741 day Onge. B) A graph including the highest coverage Group 1 (La368) individual and Group 2  
 742 (La368, Ma912) samples is best fit with Group 2 receiving ancestry from both Group 1 and the  
 743 East Asian branch. C) A graph including the Group 2 individual and Jehai, showing admixture  
 744 between Jehai and Ma912. D) TreeMix models Ma555 (Group 6) as receiving ancestry from  
 745 both a branch leading to La364 (Group 2) and present-day Igorot. E) We used a graph  
 746 framework inferred by Lipson et al. (61) and attempted to fit different ancient and present-day  
 747 SEA individuals within that framework in *qpGraph*. Note that we model present-day East  
 748 Asians (here represented by Ami) as a mixture of an Onge-like population and a population  
 749 related to the Tianyuan ancient individual. La368 is best fitted as a sister group to Onge, while  
 750 La364 is best fitted as a mixture of the ancient Onge-like population (represented by La368)  
 751 and an East Asian population (represented by Ami) (worst-fitting  $Z = 3.667$ ).







|                                 |       |                                            |    |            |    |       |         |            |
|---------------------------------|-------|--------------------------------------------|----|------------|----|-------|---------|------------|
| Pha Faen (Laos)                 | La368 | Hunter-gatherer, Hoabinhian, flexed burial | 1  | 7888 ± 40  | XY | 0.603 | M5      | C          |
| Gua Cha (Malaysia)              | Ma911 | Phase 1 - Hoabinhian                       | 1  | 4319 ± 64  | XY | 0.131 | M21b1a  | D          |
|                                 | Ma912 | Phase 2 - Neolithic farmer cemetery        | 2  | 2447 ± 65  | XY | 1.729 | M13c    | O1b1a1a1b1 |
| Ma Dai Dieu (Vietnam)           | Vt833 | Neolithic (upper layer)                    | 2  | 4171 ± 58  | XX | 0.128 | M20     | N/A        |
|                                 | Vt777 | Neolithic (upper layer)                    | 3  | 2276 ± 62  | XX | 0.147 | F1a1'4  | N/A        |
| Tam Hang (Laos)                 | La898 | Recent intrusion into Hoabinhian           | 2  | -          | XY | 0.114 | N9a6    | O          |
|                                 | La727 |                                            | 2  | 2335 ± 14  | XX | 0.942 | N9a6    | N/A        |
| Tam Pa Ping (Laos)              | La364 | Late Neolithic-Bronze Age                  | 2  | 2996 ± 47  | XY | 1.451 | F1a1a1  | O          |
| Hon Hai Co Tien (Vietnam)       | Vt880 | Neolithic - Ha Long Culture                | 2  | ~3.5kya    | ?  | 0.103 | ?       | ?          |
|                                 | Vt719 | Intrusive burial                           | 3* | 229 ± 69   | XX | 0.257 | M7c2    | N/A        |
| Nam Tun (Vietnam)               | Vt778 | Late Neolithic                             | 4* | 2652 ± 83  | XY | 0.147 | F1a1a1  | O2a2b1a2a1 |
| Nui Nap (Vietnam)               | Vt808 | Dong Son Culture                           | 3  | 2257 ± 75  | XX | 0.118 | M7b1a1  | N/A        |
|                                 | Vt781 |                                            | 3  | 2260 ± 64  | XX | 0.139 | F1a     | N/A        |
|                                 | Vt779 |                                            | 3  | 2256 ± 63  | XX | 0.141 | M7c1b2b | N/A        |
|                                 | Vt796 |                                            | 3  | 2177 ± 116 | XX | 0.110 | F1e3    | N/A        |
| Long Long Rak (Thailand)        | Th519 | Iron Age                                   | 4  | 1731 ± 51  | XY | 0.161 | B5a1d   | N          |
|                                 | Th521 |                                            | 4  | 1712 ± 59  | XY | 0.422 | F1f     | O1b1a1a1b  |
|                                 | Th703 |                                            | 4  | 1669 ± 36  | XY | 0.163 | B5a1d   | NO         |
|                                 | Th531 |                                            | 3* | 1597 ± 34  | XX | 0.086 | G2b1a   | N/A        |
|                                 | Th530 |                                            | 4  | 1668 ± 36  | XY | 0.196 | G2b1a   | IJK        |
| Loyang Ujung Karung (Indonesia) | In661 | Late Neolithic-Iron Age, flexed burials    | 5  | 1866 ± 26  | XX | 0.105 | F1a1a   | N/A        |

|                             |          |                                       |   |           |    |       |                 |          |
|-----------------------------|----------|---------------------------------------|---|-----------|----|-------|-----------------|----------|
|                             | In662    |                                       | 5 | 2199 ± 82 | XY | 0.143 | M20             | O1b      |
| Nagsabaran<br>(Philippines) | Iron Age | Red-slipped pottery -<br>Austronesian | 6 | 1818 ± 44 | ?  | 0.029 | ?               | ?        |
| Supu Hujung 4               | Ma554    | Historical                            | 6 | 424 ± 68  | XY | 0.343 | F3b1a+160<br>93 | O        |
| Kinabatangan                | Ma555    | Historical                            | 6 | 231 ± 69  | XY | 0.549 | B4b1a2          | O2a2a1a2 |

759

760

761 **List of Supplementary Materials:**

762 SOM1. Assessment of target enrichment methods

763 SOM2. Archaeological Overview

764 SOM3. Mapping

765 SOM4. Principal Component Analysis

766 SOM5. ADMIXTURE fitting

767 SOM6. f3 Statistics

768 SOM7. D-statistics

769 SOM8. TreeMix fitting

770 SOM9. qpGraph fitting

771 SOM10. Measurements of archaic ancestry

772 Table S1 - S19

773 Fig S1 - S41

774 Supplementary References: 89-115

775

776

777

778

779

780

781

782
